# Supplementary material
Source: PubMed Central journal article supplement (PMC2582323)
Supplement: 0804488105_0804488105SI.pdf [file 0804488105_0804488105SI.pdf]

# Supporting Information

Loivamäki *et al.* 10.1073/pnas.0804488105

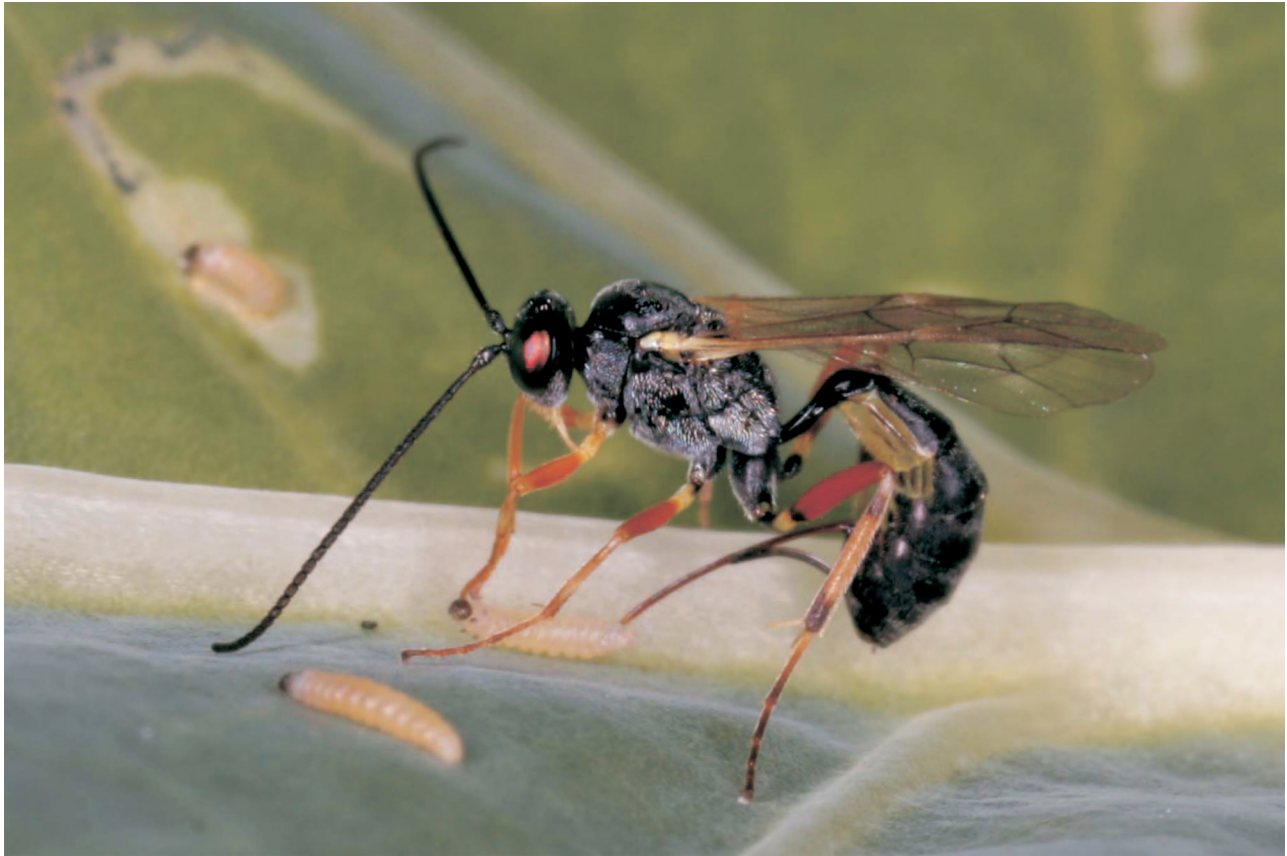

**Fig. S1.** A female of the parasitic wasp *Diadegma* sp. parasitizing a *Plutella xylostella* larva. [Reproduced with permission from Tibor Bukovinszky, Wageningen University (Copyright 2005, BugsinthePicture.com).]

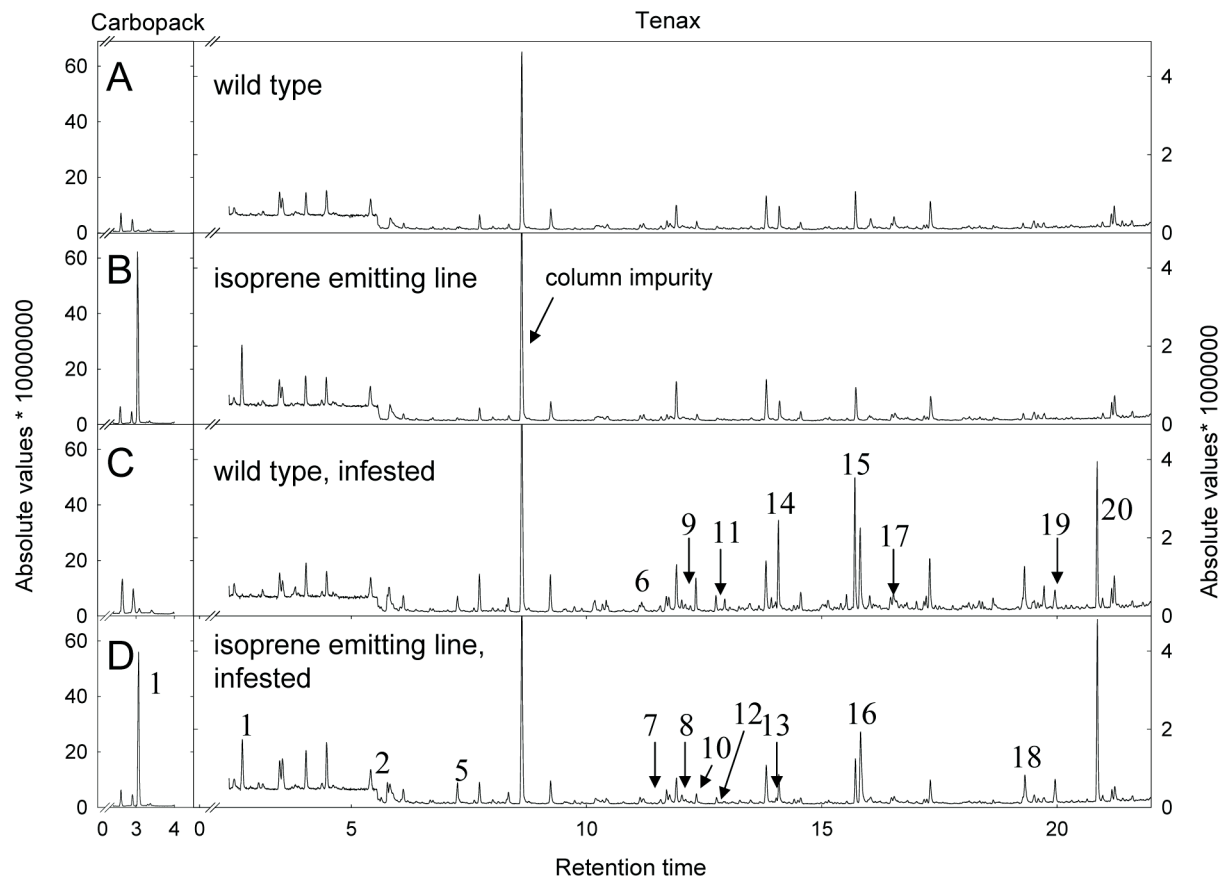

**Fig. S2.** Representative gas chromatography-mass spectrometry (TIC, total ion count) profiles of volatiles emitted by *Arabidopsis* plants. (A) Undamaged wild-type. (B) Undamaged transgenic isoprene emitting line. (C) Wild-type, infested with *Pieris rapae* for 24 h before headspace sampling. (D) Transgenic isoprene emitting line, infested with *P. rapae* for 24 h before headspace sampling. (Left) Headspace collection of isoprene on Carbopack X cartridges. (Right) Headspace collection of other volatiles on Tenax cartridges. Peak numbers refer to compound list shown in Table S1.

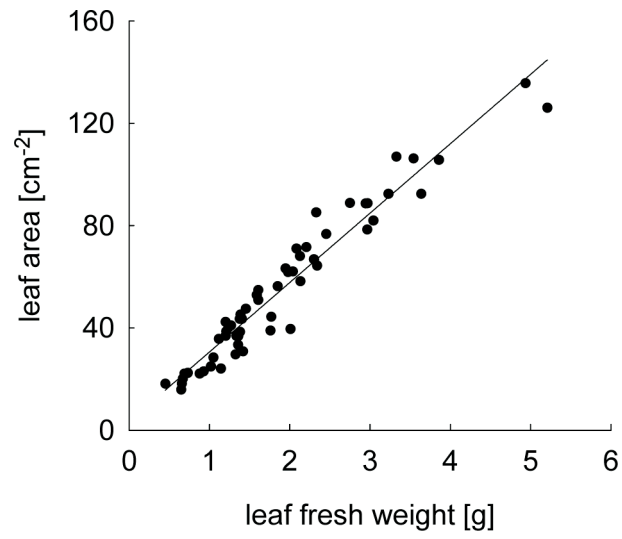

Fig. S3. Correlation between leaf area and leaf fresh weight of individual *Arabidopsis* plants. ( $R = 0.993$ ,  $n = 58$ ).

**Table S1. Compounds detected by gas chromatography-mass spectrometry in headspace samples of plants infested with *Pieris rapae* for 24 h**

|    | Herbivore-induced compounds    | LRI  | Group  |
|----|--------------------------------|------|--------|
| 1  | Isoprene                       | 512  | ISP    |
| 2  | 1-Penten-3-ol                  | 683  | OxyVOC |
| 3  | Dimethyl disulfide             | 752  | OxyVOC |
| 4  | Hexanal                        | 801  | OxyVOC |
| 5  | 4-Hydroxy-4-methyl-2-pentanone | 846  | OxyVOC |
| 6  | $\alpha$ -Pinene               | 947  | MT     |
| 7  | Camphene                       | 964  | MT     |
| 8  | Dimethyl trisulfide            | 990  | OxyVOC |
| 9  | $\beta$ -Myrcene               | 994  | MT     |
| 10 | Octanal                        | 1007 | OxyVOC |
| 11 | Limonene                       | 1043 | MT     |
| 12 | Benzonitrile                   | 1060 | OxyVOC |
| 13 | Linalool                       | 1106 | MT     |
| 14 | Nonanal                        | 1109 | OxyVOC |
| 15 | Decanal                        | 1211 | OxyVOC |
| 16 | Methyl salicylate              | 1220 | MeSA   |
| 17 | Benzothiazole                  | 1264 |        |
| 18 | Unknown compound               | 1468 | OxyVOC |
| 19 | $\alpha$ -Farnesene            | 1519 | SQT    |
| 20 | TMTT                           | 1590 | TMTT   |

Numbering of compound refers to the chromatograms shown in Fig. S2. Compounds were identified by comparing the mass spectra with those of authentic standards or with NIST 05 and Wiley library spectra. LRI, linear retention index; Group, structural clusters shown in Fig. S2.

Table S2. Statistic analysis of emission rates of WT and transgenic *Arabidopsis* rosettes with and without herbivory (Fig. 2)

| VOC            | df | P value Kruskal Wallis |                                               | P value Mann–Whitney |
|----------------|----|------------------------|-----------------------------------------------|----------------------|
| Isoprene       | 3  | 0.004                  | $w_{t(\text{con})} - w_{t(\text{infest})}$    | 0.200                |
|                |    |                        | $w_{t(\text{con})} - t_{r(\text{con})}$       | 0.016                |
|                |    |                        | $w_{t(\text{con})} - t_{r(\text{infest})}$    | 0.029                |
|                |    |                        | $w_{t(\text{infest})} - t_{r(\text{con})}$    | 0.016                |
|                |    |                        | $w_{t(\text{infest})} - t_{r(\text{infest})}$ | 0.29                 |
|                |    |                        | $t_{r(\text{con})} - t_{r(\text{infest})}$    | 0.19                 |
| Monoterpenes   | 3  | 0.728                  | —                                             | 0.29                 |
| Sesquiterpenes | 3  | 0.007                  | $w_{t(\text{con})} - w_{t(\text{infest})}$    | 0.905                |
|                |    |                        | $w_{t(\text{con})} - t_{r(\text{con})}$       | 0.029                |
|                |    |                        | $w_{t(\text{con})} - t_{r(\text{infest})}$    | 0.016                |
|                |    |                        | $w_{t(\text{infest})} - t_{r(\text{con})}$    | 0.486                |
|                |    |                        | $w_{t(\text{infest})} - t_{r(\text{infest})}$ | 0.016                |
|                |    |                        | $t_{r(\text{con})} - t_{r(\text{infest})}$    | 0.016                |
| TMTT           | 3  | 0.006                  | $w_{t(\text{con})} - w_{t(\text{infest})}$    | 0.29                 |
|                |    |                        | $w_{t(\text{con})} - t_{r(\text{con})}$       | 0.413                |
|                |    |                        | $w_{t(\text{con})} - t_{r(\text{infest})}$    | 0.029                |
|                |    |                        | $w_{t(\text{infest})} - t_{r(\text{con})}$    | 0.016                |
|                |    |                        | $w_{t(\text{infest})} - t_{r(\text{infest})}$ | 0.486                |
|                |    |                        | $t_{r(\text{con})} - t_{r(\text{infest})}$    | 0.016                |
| MeSA           | 3  | 0.006                  | $w_{t(\text{con})} - w_{t(\text{infest})}$    | 0.29                 |
|                |    |                        | $w_{t(\text{con})} - t_{r(\text{con})}$       | 0.73                 |
|                |    |                        | $w_{t(\text{con})} - t_{r(\text{infest})}$    | 0.029                |
|                |    |                        | $w_{t(\text{infest})} - t_{r(\text{con})}$    | 0.016                |
|                |    |                        | $w_{t(\text{infest})} - t_{r(\text{infest})}$ | 0.200                |
|                |    |                        | $t_{r(\text{con})} - t_{r(\text{infest})}$    | 0.016                |
| OxyVOCs        | 3  | 0.452                  | —                                             |                      |

Table S3. Statistic analysis of EAG responses of antennae of *D. semiclausum* and *C. rubecula* females (Fig. 3)

|                                       | <i>n</i> | df | t      | <i>P</i> value paired t test |
|---------------------------------------|----------|----|--------|------------------------------|
| EAG response of <i>D. semiclausum</i> |          |    |        |                              |
| 0.1–1%                                | 6        | 5  | –1.152 | 0.190                        |
| 1–10%                                 | 6        | 5  | –2.958 | 0.032                        |
| 0.1–10%                               | 6        | 5  | –4.577 | 0.006                        |
| EAG response of <i>C. rubecula</i>    |          |    |        |                              |
| 0.1–1%                                | 8        | 7  | 2.20   | 0.063                        |
| 1–10%                                 | 8        | 7  | –2.056 | 0.078                        |
| 0.1–10%                               | 8        | 7  | –0.968 | 0.365                        |
